## Characterization of methylation profiles in spontaneous preterm birth placental villous tissue

Heather M Brockway<sup>1\*</sup>, Samantha L Wilson<sup>2</sup>, Suhas G Kallapur<sup>3</sup>, Catalin S Buhimschi<sup>4</sup>, Louis J Muglia<sup>5</sup>, and Helen N Jones<sup>1</sup>

<sup>1</sup>Department of Physiology and Functional Genomics, College of Medicine at the University of Florida, Gainesville, FL, USA

<sup>2</sup>Princess Margaret Cancer Centre, University Health Network, University of Toronto, Toronto ON, Canada

<sup>3</sup>Divisions of Neonatology and Developmental Biology, David Geffen School of Medicine at the University of California, UCLA Mattel Children's Hospital, Los Angeles, CA, USA

<sup>4</sup>Department of Obstetrics and Gynecology, The University of Illinois College of Medicine, Chicago, IL, USA

<sup>5</sup>Burroughs Wellcome Fund, Research Triangle Park, NC, USA

\* Corresponding author

Email: [h.brockway@ufl.edu](mailto:h.brockway@ufl.edu)/[brockwayhm@gmail.com](mailto:brockwayhm@gmail.com)

## 1 **Abstract**

2 Preterm birth is a global public health crisis which results in significant neonatal and maternal  
3 mortality. Yet little is known regarding the molecular mechanisms of idiopathic spontaneous  
4 preterm birth, and we have few diagnostic markers for adequate assessment of placental  
5 development and function. Previous studies of placental pathology and our transcriptomics studies  
6 suggest a role for placental maturity in idiopathic spontaneous preterm birth. It is known that  
7 placental DNA methylation changes over gestation. We hypothesized that if placental  
8 hypermaturity is present in our samples, we would observe a unique idiopathic spontaneous  
9 preterm birth DNA methylation profile potentially driving the gene expression differences we  
10 previously identified in our placental samples. Our results indicate the idiopathic spontaneous  
11 preterm birth DNA methylation pattern mimics the term birth methylation pattern suggesting  
12 hypermaturity. Only seven significant differentially methylated regions fitting the idiopathic  
13 spontaneous preterm birth specific (relative to the controls) profile were identified, indicating  
14 unusually high similarity in DNA methylation between idiopathic spontaneous preterm birth and  
15 term birth samples. We identified an additional 1,718 significantly methylated regions in our  
16 gestational age matched controls were the idiopathic spontaneous preterm birth DNA methylation  
17 pattern mimics the term birth methylation pattern, again indicating a striking level of similarity  
18 between the idiopathic spontaneous preterm birth and term birth samples. Pathway analysis of  
19 these regions revealed differences in genes within the WNT and Cadherin signaling pathways,  
20 both of which are essential in placental development and maturation. Taken together, these data  
21 demonstrate that the idiopathic spontaneous preterm birth samples are molecularly more mature  
22 than expected given their respective gestational age which likely impacts birth timing.

## 23 **Introduction**

24           Preterm birth (PTB), defined as delivery at less than 37 weeks of gestation is the leading  
25 cause of neonatal mortality worldwide. Prematurity affects an average of 10% of infants born in  
26 the United States with rates increasing and costs approximately \$26.2 billion dollars a year (annual  
27 societal cost including medical, educational, and lost productivity)(1,2). The majority (50%) of  
28 preterm births are idiopathic and spontaneous (isPTB), rather than being medically indicated (e.g.,  
29 pre-eclampsia). Risk factors include but are not limited to genetic ancestry, fetal sex,  
30 environmental exposures, and economic disparities(3). Complications include developmental  
31 delays, growth restriction, chronic respiratory problems as well as adult sequelae(3). Studies into  
32 the etiology of preterm birth have implicated a role for the placenta, a central component of the  
33 maternal-fetal interface, which has a vital role in pregnancy initiation, maintenance, and birth  
34 timing as well as fetal growth and development(4). As such, proper placental development,  
35 maturation, and function are essential for a successful pregnancy outcome and life-time offspring  
36 health. Each of these processes is an intricate balance of molecular interactions that are not fully  
37 understood even in healthy, normal, term pregnancies.

38           Placental maturation is accompanied by a marked increase in placental surface area due to  
39 placental remodeling initiated between 20-24 weeks gestation and continuing throughout the  
40 remainder of gestation which accommodates exponential fetal growth across the second half of  
41 gestation (4). Under normal physiological conditions, placental maturation is recognized by  
42 specific histological hallmarks including increased quantities of terminal villi (<80 microns in  
43 diameter), syncytial nuclear aggregates (SNAs, 10+ syncytial nuclei being extruded from the  
44 syncytiotrophoblast), and formation of the vasculosyncytial membranes (VSM) which when

45 observed in significant quantities prior to 37 weeks, signify placentas with advanced villous  
46 maturation (AVM)(5,6). Histological studies of pathological placentas indicate AVM occurs in  
47 50-60% of isPTB and medically indicated preterm births(7,8). This indicates a potential  
48 developmental disconnect between placental maturation and the corresponding fetal maturation.  
49 In infection associated preterm births, AVM was observed in less than 20% of pathologic  
50 placentas(7,8). These studies indicate multiple morphological endotypes exist, underlying the  
51 classical clinical PTB phenotypes, especially those of spontaneous PTB which are based on  
52 gestational age and simply defined as early, moderate, and late(9). The identification of these  
53 morphological endotypes further highlights the heterogeneity confounding the identification of  
54 PTB etiology and potential diagnostic biomarkers.

55 Multiple levels of heterogeneity confound elucidation of molecular mechanisms involved  
56 in PTB, from inconsistent sampling of interface tissues to the numerous cell types within those  
57 tissues to individual differences within larger populations(10–13). However, traditional  
58 epidemiological studies have not accounted for this morphological, molecular, and physiological  
59 heterogeneity. Instead, the use of extensive covariate data to attempt overcome population-based  
60 heterogeneity has resulted in statistical overfit of models to their specific datasets, resulting in a  
61 loss of reproducibility and generalizability of biological inference across datasets(14,15). This has  
62 led to a dearth of robust biomarkers capable of assessing spontaneous PTB risk and managing real-  
63 time clinical care. Our approach differs from the population based epidemiological approaches in  
64 that we focus molecular profiling in smaller, prescreened datasets with combined with select  
65 harmonizable covariate data that can be obtained for any dataset.

66 We have previously identified transcriptomic profiles of AVM in a small cohort using  
67 clinically phenotyped placental villous samples from spontaneous PTB births, including isPTB

68 and infection associated births, between 29 and 36 weeks and normal term births (TB) between 38  
69 and 42 weeks(16). In our datasets, we define infection associated preterm births as acute histologic  
70 chorioamnionitis (AHC) which have been identified via histological assessment of inflamed fetal  
71 membranes or molecular assessment(16). Given the importance of DNA methylation (DNAm) to  
72 placental development and maturation(17–20), we hypothesized the gene expression differences  
73 we observed in our transcriptome data could be due to changes in DNAm at CpG islands between  
74 the birth types. Therefore, we sought to identify specific DNAm profiles of placental maturation  
75 associated with our transcriptional profiles of maturation.

76

## 77 **Materials and Methods**

### 78 **Study Population**

79 This study was approved by the Cincinnati Children’s Hospital Medical Center institutional review  
80 board (#IRB 2013-2243, 2015-8030, 2016-2033). De-identified TB (n=6), isPTB (n=8), and AHC  
81 (n=8) placental villous samples along with appropriate covariate information were obtained from  
82 the following sources: The Global Alliance to Prevent Prematurity and Stillbirth (GAPPS) in  
83 Seattle Washington USA, the Research Centre for Women’s and Infant’s Health (RCWIH) at Mt  
84 Sinai Hospital Toronto Canada, and the University of Cincinnati Medical Center (UCMC).  
85 Inclusion criteria included: maternal age 18 years or older, singleton pregnancies with either  
86 normal term delivery (38-42 weeks’ gestation) or preterm delivery (29-36 weeks’ gestation)  
87 without additional complications. Additional information regarding these samples can be found  
88 in(16).

89

90

## 91 **Statistical Analyses**

92 Cohort data were analyzed in Prism v8 (GraphPad). Data were evaluated for normality and non-  
93 parametric tests applied as appropriate. Non-parametric data are expressed as median and range  
94 and were analyzed by Kruskal-Wallis Test ANOVA with Dunn's Multiple Comparisons.  
95 Categorical data were analyzed using Fisher's Exact Test. These analyses were run independently  
96 of those included in(16).

97

## 98 **Intersection of transcriptomic candidate genes and CpG islands**

99 Using the table function of the UCSC Genome Browser build hg38, we conducted a batch query  
100 using the 340 candidate genes from our previous transcriptome study(16). Using these genes as  
101 identifiers, we created an intersection with the CpG Island Track(21). This created an output table  
102 with gene names, genomic positions, and overlapping CpG islands. We then calculated the  
103 percentage of genes that overlapped with CpG islands.

104

## 105 **DNA Methylome Generation**

106 DNA was isolated from homogenized, snap frozen placental villous samples using the DNAeasy  
107 Kit (Qiagen). DNA quantity and quality was assessed using Qubit 4 Fluorometer (Invitrogen) and  
108 Nanodrop Spectrophotometer (Thermo Fisher Scientific). A minimum of 500ng was submitted to  
109 the University of Minnesota Genomics Center and the University of Cincinnati Genomics,  
110 Epigenomics and Sequencing Core where DNA quantity and quality assessment on a Bioanalyzer

111 (Aligent), bisulfite conversion, and methylome generation on the Illumina Methylation EPIC Bead  
112 Chip.

113

## 114 **DNA Methylation array data processing**

115 Methylation data processing and analyses based on a previously developed workflow(22).  
116 All packages are available within Bioconductor(23) and all package scripts were run in RStudio/R  
117 v4.0.2(24,25). IDAT file preprocessing and probe quality control was conducted in R using scripts  
118 based on minfi(26) and methylumi(27). IDAT files and a sample file containing covariate and  
119 BeadChip metadata were loaded into R where data quality was assessed using the mean detection  
120 p-values for the probes in each sample. We applied Functional  
121 Normalization(preprocessFunnorm)(28) for the algorithm's ability to utilize the internal control  
122 probes for each individual sample in an unsupervised manner to control for unwanted variation.

123 After normalization, we excluded individual low-quality probes with a detection p-value >  
124 0.1 in more than 2 samples or bead count <3 in at least 5% of samples, sex chromosome probes,  
125 cross-hybridizing probes, and probes where SNPs (within the binding region or within 5-10bp of  
126 the binding region) could potentially affect hybridization(22). To ensure appropriate filtering of  
127 problematic probes, we utilized several resources including the Illumina Methylation EPIC  
128 BeadChip hg38 manifest and Zhou et al(29) to identify additional variation that would interfere  
129 with probe hybridization. We utilized McCartney et al(30) to filter the cross-hybridizing probes  
130 that are not listed in the manifest. We removed all probes that reside in the ENCODE DAC black-  
131 list regions(31). All filtering criteria and number of probes filtered can be found in S1 Table.

132           Once probe filtering was complete, we assessed the data for batch effects using principal  
133 component analysis (PCA) and no significant batch effect was observed, therefore no correction  
134 was applied(32). The resulting data matrix contained M-values which were utilized for the  
135 statistical analyses of the pairwise comparisons due to their statistical robustness.  $\beta$ -values, which  
136 are transformed M-values, represent the ratio of all methylated probe intensities over total signal  
137 intensities or a percentage of methylation(33). All methylation values are delta M-values unless  
138 otherwise stipulated as they provide a better detection and true positive rates while reducing  
139 heteroscedasticity for methylation sites that are highly or non-methylated(33)

140

## 141 **Identification of differentially methylated positions**

142           To assess differentially methylated positions (DMPs), we utilized generalized linear  
143 models within limma(34) to assess differential methylation for each individual probe within the  
144 M-value matrix as in (22) with adjustment for birth types and fetal sex as covariates within model.  
145 Due to the small sample numbers in our dataset, we did not assess any additional covariate data in  
146 this analysis as to not overfit the statistical models to this specific dataset and to increase  
147 generalizability of our findings in future studies. The following pairwise comparisons were used  
148 to identify significant positions of differential methylation: isPTB versus AHC, TB versus AHC  
149 and isPTB versus TB. The resulting output for these comparisons is a delta M-value representing  
150 the statistical difference in methylation at that position between the conditions being compared.  
151 Multiple corrections testing was conducted using the Benjamini Hochberg method(35) at multiple  
152 Q values: <0.05, <0.1, <0.2 and <0.3 (S2 Table). We tested Q values to determine if our lack  
153 observations in one pairwise comparison at Q=0.05 were due to a technical error or if these



154 represented a true lack biological variability despite the statistical parameter selection. We opted  
155 to define significant DMPs with a  $Q < 0.3$  and a  $\log_2$  fold-change of  $> \pm 1$ .

156

## 157 **Methylome profile Identification**

158 To identify methylation profiles, we used Venny 2.0(36) to generate Venn diagrams to intersect  
159 significant DMPs from each pairwise comparison to identify profiles specific to isPTB and AHC.

160 An isPTB profile was defined as any DMP where the delta M-value of isPTB vs TB or AHC was  
161 differentially methylated compared to the delta M-values of AHC vs TB which were non-  
162 significant. An AHC profile was defined as any DMP where the AHC vs TB or AHC delta M-  
163 value was differentially methylated from the isPTB vs TB delta M-values which were non-  
164 significant. Heatmaps were generated in Prism v8 (GraphPad) using delta M-values. To assess if  
165 the differential methylation was influenced by outliers or by artifacts, we generated violin plots  
166 with  $\beta$ -values with median and quartiles in Prism v8 to check the distribution within selected  
167 individual samples.

168

## 169 **Differentially Methylation Region (DMR) Identification**

170 We used DMRcate v2.2.3(22,37) to identify differentially methylated regions comprised of  
171 significant DMPs within a specified distance using moderated t statistics. To identify significant  
172 DMPs within DMRcate, we used the M-value matrix (normalized and filtered) and set a threshold  
173 of Benjamini Hochberg adjusted p-value  $< 0.3$ . Since DMRcate uses limma to determine the  
174 significant DMPs, we were able to utilize the same glm design from the initial DMPs analysis  
175 against adjusting for fetal sex. Once significant DMPs were identified, DMR identification

176 thresholds were set at  $\lambda=1000$ ,  $C=2$ , and minimum  $\text{cpgs}=5$ . As we are analyzing array data,  
177 we opted to use the default  $\lambda$  and  $C$  (scaling factor) which allows for optimal differentiation  
178 with 1 standard deviation of support to account for Type 1 errors. Once significant DMRs were  
179 identified in each pairwise comparison, we intersected them using Venny 2.0 to identify isPTB  
180 and AHC specific DMRs. The isPTB profile was defined as any DMR that was differentially  
181 methylated when compared to the AHC and TB, with the AHC vs TB. The AHC profile was  
182 defined as any DMR that was differentially methylated compared to isPTB and TB and where the  
183 isPTB vs TB methylation was non-significant meaning no DMR was identified in DMRcate. We  
184 also set a mean difference in differentiation threshold of 0.01. Heatmaps were generated in Prism  
185 v8 (GraphPad) using delta M-values.

186

## 187 **Functional analyses of DMRs with associated genes**

188 Genes with associated DMRs were entered into the Panther Pathway DB(38) for statistical  
189 overrepresentation analyses for Reactome Pathways and to assess gene ontology (GO) for  
190 biological and molecular processes. Fisher's Exact tests were used to determine significance and  
191 Bonferroni correction for multiple comparisons. Pathways were considered significant if they had  
192 an adjusted p-value  $<0.05$ .

193

## 194 **Intersection of DMRs with transcriptome candidate genes**

195 To determine if any of our significant DMR's impacted candidate gene expression, we intersected  
196 the DMR's genomic locations with our candidate gene locations. All genomics regions were  
197 mapped to hg38. Where there was overlap, indicating a potential regulatory event, we took those

198 locations and intersected with using the UCSC Genome Table browser (hg38) and the CpG island  
 199 tracks (21), using the feature-by-feature function. This allowed for identification of DMRs in CpG  
 200 regions of our candidate genes.

201

## 202 **Results**

### 203 **Methylation Study Characteristics**

204 Maternal and fetal characteristics for the three different pregnancy outcomes included in  
 205 the DNAm analyses are presented in Table 1. Transcriptomes from these samples were previously  
 206 published(16). Due to the amount of sample required for DNA extraction only a subset of the  
 207 samples were used and the statistical analyses repeated but did not change. Significant differences  
 208 were observed in gestational age and fetal weights between AHC and isPTB samples compared to  
 209 the TB samples ( $p < 0.05$ ). All AHC and TB for which there were fetal weights available were  
 210 appropriate for gestational age. We included males and females in each sample set and adjusted  
 211 the linear models for fetal sex in addition to birth outcome. It is important to note that in this study,  
 212 we have mixed genetic ancestry within each of the sample sets.

213 **Table 1: Clinical characteristics of the placental villous samples included in this study**

| <b>Characteristics</b>  | <b>Acute Histological<br/>Chorioamnionitis Births<br/>(AHC)</b> | <b>Idiopathic<br/>Spontaneous Preterm<br/>Births (isPTB)</b> | <b>Term Births</b> | <b>p-values</b>      |
|-------------------------|-----------------------------------------------------------------|--------------------------------------------------------------|--------------------|----------------------|
| Number of samples       | 8                                                               | 8                                                            | 6                  |                      |
| Maternal Age            | 34.5(25-40)                                                     | 25(18-39)                                                    | 28(19-37)          | NS <sup>1</sup>      |
| Gestational Age         | 32(29-35)*                                                      | 33(30-36)*                                                   | 39(38-41)          | <0.0001 <sup>1</sup> |
| Fetal sex<br>(% female) | 3(38%)                                                          | 6(55%)                                                       | 4(38%)             | NS <sup>2</sup>      |
| Fetal weight<br>(grams) | 1765(1360-2300)*                                                | 2105(1450-2722)*                                             | 3820(3650-4527)    | <0.0001 <sup>1</sup> |

|                         |           |          |           |                      |
|-------------------------|-----------|----------|-----------|----------------------|
| Birth weight percentile | 55(20-80) | 60(3-80) | 90(60-99) | NS <sup>1</sup>      |
| SGA %                   | 0         | 18.0%    | 0         |                      |
| <u>Delivery type</u>    |           |          |           |                      |
| Cesarean (%)            | 4(50%)    | 4(37%)   | 5(50%)    | NS <sup>2</sup>      |
| <u>Infection Status</u> |           |          |           |                      |
| (% Positive)            | 8(100%)*  | 0(0%)    | 0(0%)     | <0.0001 <sup>2</sup> |

214 Data shown as median with range or total number with percent

215 \*Significant statistical difference from term NS=Not significant

216 <sup>1</sup>ANOVA with Tukey's correction for multiple comparisons

217 <sup>2</sup>Chi Square Analyses

218

## 219 **Identification of transcriptomic profile candidate genes with** 220 **overlapping CpG islands**

221 The intersection of isPTB specific methylation profiles with the previously identified 170  
222 upregulated genes in isPTB samples yielded 102 candidates (60%) overlapping with CpG islands  
223 in their coding regions. In the AHC profile, 120/170 (81%) candidate genes intersected with CpG  
224 islands within coding regions.

225

## 226 **Identification of significant differentially methylated positions (DMP)**

227 Preliminary quality control identified one sample with mean probe detection p-value >0.1  
228 and it was subsequently removed from methylation analyses. Prior to normalization and  
229 subsequent probe filtering, there were 866,901 probes in the data matrix. After normalization and  
230 filtering, 108,691 probes were removed, leaving 758,210 probes in the matrix for analyses (S1  
231 Table).

232 Our initial statistical testing using the Benjamini Hochberg Q cutoff of 0.05 did not yield  
233 any significant DMPs in the isPTB vs TB pairwise comparison. With a Type 1 error rate of 5%,

234 we expected to observe approximately 37,910 statistically significant DMPs in this comparison;  
235 however, we observed 0. By relaxing the rate of acceptable Type 1 errors to 30%, we would expect  
236 to observe 227, 463 statistically significant DMPs, yet we only observed a total of 662 significant  
237 DMPs (S2 Table). We test modeled various statistical parameters to determine if our observations  
238 were due to technical errors or true biological differences. At every Q value tested and with  
239 different statistical models, we observed the number of DMPs between isPTB and TB to be  
240 significantly less than expected. Ultimately, we opted on a Q cutoff of 0.3 in limma(34).

241 We then set a threshold for differential methylation of log<sub>2</sub> fold-change of >1. The DMP  
242 analysis identified a total of 24,202 significant DMPs across all pairwise comparisons in the model.  
243 In the isPTB vs AHC comparison we identified 8,309 DMPs, 4,334 with reduced methylation and  
244 3,975 more methylated in isPTB compared to AHC. In the TB vs AHC comparison, we identified  
245 a total of 15,817 DMPs with 7,170 less methylated and 8,647 more methylated in TB. Lastly, in  
246 the isPTB vs TB comparison, 85 DMPs were identified as significant with 13 more methylated  
247 and 72 less methylated (Fig 1A).

248 We observed differences in genomic location of the DMPs between the pairwise  
249 comparisons and thus, analyzed the genomic location distribution of the DMPs per comparison  
250 (Fig 1B). In the isPTB vs AHC and TB vs AHC comparisons the majority of DMPs were associated  
251 with CpG islands, shores, shelves (isPTB = 70% and TB = 65%) while the remaining DMPs were  
252 in open sea locations which are typically 3-4kb away from CpG islands (isPTB = 30% and TB =  
253 35% respectively). In contrast, in the isPTB vs TB comparison, 70% of the DMPs were associated  
254 with open sea positions while only 30% associated with CpG islands, shores, and shelves. The first  
255 step in identification of a DMP methylation profile was to intersect the significant DMPs from

256 each pairwise comparison and determine which would potentially segregate into an isPTB or AHC  
257 profile (Fig1C).

258

259 **Fig 1: Identification of methylation profiles using a comparative approach.**

260 **A.** Differentially methylated positions were identified using pairwise comparisons in limma. Red  
261 points indicate significant DMPs with a threshold of log<sub>2</sub> fold-change >1 and Benjamini Hochberg  
262 adjusted p-value <0.3. Blue lines represent log<sub>2</sub> fold-change of 1. **B.** Genomic distribution of  
263 DMPs in the pairwise comparisons. The majority of DMPs in the isPTB and TB verses AHC  
264 comparisons are located inside or close to known CpG islands. However, in the isPTB verses TB  
265 comparison, the majority of DMPs are in open sea regions with no known islands within 4kb. **C.**  
266 The venn diagram represents the intersection of pairwise comparisons to classify significant DMPs  
267 into isPTB and AHC specific methylation profiles.

268

269 **Isolation of isPTB and AHC DNA methylation profiles using DMPs**

270 As a result of the intersection of significant DMPs, we identified 47 potential isPTB  
271 specific DMPs. Upon examining the DNAm patterns for these DMPs across all pairwise  
272 comparisons, we wanted to know which DMPs has differential methylation in the isPTB versus  
273 the AHC and TB. We ultimately isolated 3 isPTB specific DMPs out of the 47 potential isPTB  
274 DMPs. Our examination of the individual sample beta values and their distribution for each DMP  
275 confirmed our findings were not due to artifacts or outliers (Fig 2A). Although we initially  
276 identified 8,306 potential AHC specific DMPs via the intersection, upon further examination of  
277 the DNAm pattern, we ultimately isolated 6,177 where the AHC samples were differentially

278 methylated compared TB or isPTB (Fig 2B). Of these, 3,002 are more methylated and 3,175 are  
279 less methylated. We also examined the genomic location distribution of the AHC profile DMPs  
280 and found that 76% were located within CpG islands, shores, and shelves with remaining 24%  
281 located in open sea regions (S1 Fig).

282

## 283 **Figure 2: Identification of significant methylation profiles for isPTB and AHC DMPs.**

284 **A.** Three DMPs identified as having an isPTB specific methylation pattern where the isPTB  
285 samples were differentially methylated compared to the AHC or TB samples. The distribution of  
286 individual sample beta values was assessed to determine if there were outliers or artifacts  
287 influencing the methylation patterns. The dark bands represent the mean of the methylation values  
288 while the lighter grey bands represent the interquartile range. **B.** 6,177 DMPs demonstrating a  
289 methylation pattern where the AHC samples were differentially methylated compared to the isPTB  
290 or TB samples. The breakout heatmap shows the pattern of the top 25 more and less methylated  
291 samples and demonstrates the similarity of methylation between the isPTB and TB samples. The  
292 distribution of individual sample beta values was assessed to determine if there were outliers or  
293 artifacts influencing the methylation patterns.

294

## 295 **Identification of differentially methylated regions (DMRs)**

296 To identify differentially methylated regions, we used the M-value matrix of data values  
297 previously generated in our initial analyses. We utilized again a relaxed  $Q < 0.3$  to ensure we would  
298 be able to identify enough CpG sites to identify DMRs in the isPTB vs TB comparison (S3 Table).  
299 Only then, we were able to identify significant DMRs within all pairwise comparisons (Table 2).

300 56 DMRs were observed within the isPTB vs TB comparison in contrast to the thousands  
301 significant DMRs identified in the isPTB and TB verses AHC pairwise comparisons. All isPTB  
302 vs TB DMRs were under 2000bp wide and had no more than 18 CpG sites in any given DMR. In  
303 contrast, the DMRs in the isPTB and TB vs AHC comparisons were wider and encompassed more  
304 probes (Table 2). We intersected the DMRs and identified potential candidate DMRs for isPTB  
305 and AHC methylation profiles (S2 Fig). Ultimately, we identified 51 potential isPTB specific and  
306 12,843 AHC specific DMRs. These DMRs overlap with coding and non-coding loci across the  
307 genome as per the annotation from DMRcate package(37).

308 **Table 2 Summary of significantly differentiated DMRs identified by DMRcate encompassing**  
309 **both coding and non-coding loci**

| Pairwise comparison | Number of Significant DMRs Identified* | Width of DMR (Range) | Number of Significant Probes in DMR (Range) |
|---------------------|----------------------------------------|----------------------|---------------------------------------------|
| isPTB vs TB         | 56                                     | 180-1750bp           | 5-18 probes                                 |
| isPTB vs AHC        | 12,883                                 | 83-9,386bp           | 5-110 probes                                |
| TB vs AHC           | 19,006                                 | 37-14,383bp          | 5-202 probes                                |

311 \*minimum smoothed FDR <0.05

312

## 313 Identification and function of DMRs specific to isPTB and AHC

314 Of the 51 candidate isPTB DMRs, only seven demonstrated an isPTB specific profile (Fig  
315 3 and Table 3). Six isPTB specific DMRs overlap coding/non-coding loci with only one sitting in  
316 an upstream promoter region, *LINC02028* (Table 4). This is the only isPTB-specific DMR that  
317 overlaps with a CpG island. Four of the DMRs sit within transcripts for *FAM186A*, *NOD2*, *UBL7-*  
318 *ASI*, and *PDE9A*, more specifically within introns or at intron/exon boundaries. The remaining  
319 two DMRs sit in the 3'UTR of genes, *ZBTB4* and *STXB6*, with the *ZBTB4* DMR crossing the last  
320 exon/UTR boundary (Table 4). No over-represented pathways were identified.



321  
 322 **Figure 3: isPTB specific DMR profile.** Differentially methylated DMRs were identified by  
 323 differences in the mean of the probe values across the DMR. Only 7 isPTB DMRs had an isPTB  
 324 specific profile where the isPTB DMRs were less methylated than the TB or AHC DMRs. Two of  
 325 the DMRs overlap non-coding regions. No DMRs were identified that were more methylated.

326

327 **Table 3: Summary of isPTB profile DMRs**

328

| Locus            | Mean Difference Methylation for all probes in DMR |              |           | DMR coordinates          |
|------------------|---------------------------------------------------|--------------|-----------|--------------------------|
|                  | isPTB vs TB                                       | isPTB vs AHC | TB vs AHC |                          |
| <i>LINC02028</i> | -0.033                                            | -0.028       | 0.007     | chr3:194072066-194072416 |
| <i>FAM186A</i>   | -0.0416                                           | -0.0175      | 0.0192    | chr12:50343856-50344626  |
| <i>NOD2</i>      | -0.043                                            | -0.015       | 0.022     | chr16:50715192-50715700  |
| <i>UBL7-AS1</i>  | -0.054                                            | -0.028       | 0.005     | chr15:74466794-74467158  |
| <i>ZBTB4</i>     | -0.058                                            | -0.045       | 0.0008    | chr17:7461421-7462028    |
| <i>PDE9A</i>     | -0.059                                            | -0.066       | 0.054     | chr21:42733397-42733894  |
| <i>STXB6</i>     | -0.087                                            | -0.0466      | 0.042     | chr14:24808650-24810213  |

329

330

331 **Table 4: Functional information for the isPTB DMRs**

332

| Locus            | Overlaps with CpG Island | Location             |
|------------------|--------------------------|----------------------|
| <i>LINC02028</i> | chr3:194070715-194071468 | Promoter             |
| <i>FAM186A</i>   | NA                       | Intronic             |
| <i>NOD2</i>      | NA                       | Intronic             |
| <i>UBL7-AS1</i>  | NA                       | Intronic             |
| <i>ZBTB4</i>     | NA                       | 3'UTR/last exon      |
| <i>PDE9A</i>     | NA                       | Intron/exon boundary |
| <i>STXB6</i>     | NA                       | 3'UTR                |

333

334

335 Of the 12,843 AHC specific DMRs, only 1,718 demonstrated an AHC specific  
 336 methylation pattern. These DMRs include coding and non-coding loci (Fig 4A and S4 Table). Of

337 these, 801 DMRs are more methylated while 917 are less methylated than corresponding DMRs  
338 in the isPTB or TB pairwise comparison. In the top 25 more/less methylated loci, the lack of  
339 significant differences in methylation can clearly be observed in TB vs isPTB (Fig 4B). Of these,  
340 19% (n=328) had direct overlap with CpG islands. The remaining 81% had no overlap at all with  
341 CpG islands.

342

343 **Figure 4: AHC specific DMR profile A.** Differentially methylated DMRs were identified by  
344 differences in the mean of the probe values across the DMR. AHC specific DMRs are defined by  
345 when the AHC DMRs were differentially methylated compared to the TB or isPTB DMRs. **B.** The  
346 top 25 more and less methylated DMRs demonstrates the clarity of the molecular profile, as there  
347 is no significant differential methylation in the TB vs isPTB comparison.

348

349 We assessed the potential implications of the AHC specific DMRs using statistical over-  
350 representation analyses for pathways and GO terms. In the more methylated DMRs, we identified  
351 two significantly over-represented pathways: WNT and Cadherin signaling (Table 5). Significant  
352 Biological Process GO terms included homophilic cell adhesion via plasma membrane adhesion  
353 molecules (GO:0007156) and cell-cell adhesion via plasma-membrane adhesion molecules  
354 (GO:0098742).

355

356

357

358

359

360  
361  
362  
363  
364  
365  
366  
367

**Table 5: Bioinformatic functional assessment of more methylated AHC profile DMRs via PantherDB**

|                                                                              | <i>Homo sapiens</i><br>(all genes in database) | Genes from input list | Expected | Fold Enrichment | Adjusted p-value* |
|------------------------------------------------------------------------------|------------------------------------------------|-----------------------|----------|-----------------|-------------------|
| <b>PANTHER Pathways</b>                                                      |                                                |                       |          |                 |                   |
| Cadherin signaling pathway (P00012)                                          | 164                                            | 21                    | 5.34     | 3.94            | 6.51E-05          |
| Wnt signaling pathway (P00057)                                               | 317                                            | 30                    | 10.31    | 2.91            | 1.03E-04          |
| <b>GO biological process complete</b>                                        |                                                |                       |          |                 |                   |
| homophilic cell adhesion via plasma membrane adhesion molecules (GO:0007156) | 168                                            | 26                    | 5.47     | 4.76            | 4.62E-06          |
| cell-cell adhesion via plasma-membrane adhesion molecules (GO:0098742)       | 257                                            | 28                    | 8.36     | 3.35            | 1.05E-03          |
| <b>GO molecular function complete</b>                                        |                                                |                       |          |                 |                   |
| ion binding (GO:0043167)                                                     | 6354                                           | 277                   | 206.71   | 1.34            | 5.61E-05          |
| binding (GO:0005488)                                                         | 16539                                          | 593                   | 538.05   | 1.1             | 8.90E-05          |
| molecular function (GO:0003674)                                              | 18245                                          | 631                   | 593.55   | 1.06            | 4.23E-03          |
| metal ion binding (GO:0046872)                                               | 4268                                           | 192                   | 138.85   | 1.38            | 4.82E-03          |
| cation binding (GO:0043169)                                                  | 4354                                           | 194                   | 141.65   | 1.37            | 9.08E-03          |
| adenyl nucleotide binding (GO:0030554)                                       | 1572                                           | 84                    | 51.14    | 1.64            | 3.90E-02          |

368 \*Fisher Test Bonferroni Corrected for multiple comparisons

369

370 No significant over-represented pathways were identified in the less methylated DMRs.

371 The significant Biological Process GO terms that were associated with the less methylated dataset

372 include cell morphogenesis involved in differentiation (GO:0000904), cell morphogenesis

373 (GO:0000902) and detection of chemical stimulus (GO:0009593). For Molecular Function, the

374 following significant GO terms were identified: ion binding (GO:0043167), protein binding

375 (GO:0005515), protein binding (GO:0005515), and olfactory receptor activity (GO:0004984)

376 (Table 6)

377

378 **Table 6: Bioinformatic functional assessment of less methylated AHC profile DMRs via**

379 **PantherDB**

380

|                                                                                  | <i>Homo sapiens</i> (all<br>genes in<br>database) | Genes from<br>input list | Expected | Fold<br>Enrichment | Adjusted<br>p-value* |
|----------------------------------------------------------------------------------|---------------------------------------------------|--------------------------|----------|--------------------|----------------------|
| <b>GO biological process<br/>complete</b>                                        |                                                   |                          |          |                    |                      |
| cell morphogenesis involved<br>in differentiation<br>(GO:0000904)                | 568                                               | 49                       | 21.68    | 2.26               | 5.15E-03             |
| detection of chemical stimulus<br>(GO:0009593)                                   | 522                                               | 2                        | 19.92    | 0.1                | 8.02E-03             |
| cell morphogenesis<br>(GO:0000902)                                               | 721                                               | 56                       | 27.52    | 2.04               | 1.96E-02             |
| detection of chemical stimulus<br>involved in sensory perception<br>(GO:0050907) | 486                                               | 2                        | 18.55    | 0.11               | 3.64E-02             |
| <b>GO molecular function<br/>complete</b>                                        |                                                   |                          |          |                    |                      |
| binding (GO:0005488)                                                             | 16539                                             | 689                      | 631.2    | 1.09               | 2.56E-04             |
| protein binding (GO:0005515)                                                     | 14359                                             | 615                      | 548.01   | 1.12               | 4.39E-04             |
| molecular function<br>(GO:0003674)                                               | 18245                                             | 739                      | 696.31   | 1.06               | 1.33E-03             |
| ion binding (GO:0043167)                                                         | 6354                                              | 310                      | 242.5    | 1.28               | 1.69E-03             |
| olfactory receptor activity<br>(GO:0004984)                                      | 441                                               | 2                        | 16.83    | 0.12               | 4.87E-02             |

381 \*Fischer Test Bonferroni Corrected for multiple comparison  
382

383

384

385

## 386 **Identification of DMRs in regulatory elements of transcriptome** 387 **candidate genes**

388       Upon intersection of significant DMRs and the candidate genes, none of the isPTB DMRs  
389 intersected with any of the isPTB candidate genes. Out of the 1,718 significant AHC DMRs, only  
390 eight intersected with the AHC candidate genes (Table 7). Interestingly, six of these DMRs have  
391 methylation patterns, in all cases less methylated, that agree with upregulated transcription status.  
392 The remaining two have no correlation between profiles (S5 Table).

393       For each of these eight genes, we examined the genomic location to determine if these  
394 DMRs were in promoters or CpG islands, potentially regulating gene expression. We observed  
395 only one DMR, *CDKN2A*, that overlapped with CpG islands 5' upstream of their transcripts. The  
396 DMR upstream of *CDKN2A* also resides in the same genomic area as a non-coding transcript,  
397 *CDKN2B*. The remaining seven DMRs did not overlap any CpG islands although, two were in the  
398 promoter or first intronic region of their associated genes. *CENPM* and *RBPM2* have multiple  
399 transcripts and the location of the DMR varies depending on the specific transcript length and start  
400 site. Three DMRs reside in introns or across intron/exon boundaries (Table 7).

401

402

403

404 **Table 7: DMR Characterization and comparison to transcriptome profiles**

405

| DMR Genomic Location     | DMR Associated Gene     | DMR Size (bp) | Total CpGs in DMR | DMR location                  | Island Intersection    | Methylation status at DMR | AHC Transcriptome profile | Methylation and Transcriptome Agreement |
|--------------------------|-------------------------|---------------|-------------------|-------------------------------|------------------------|---------------------------|---------------------------|-----------------------------------------|
| chr9:21993972-21995735   | <i>CDKN2A-CDKN2B-AS</i> | 1764          | 13                | In promoter                   | chr9:21993972-21995735 | Less                      | Upregulated               | Yes                                     |
| chr12:6938111-6939048    | <i>ATN1</i>             | 938           | 6                 | Mid-gene intron/exon boundary | No                     | Less                      | Upregulated               | Yes                                     |
| chr22:41939981-41941494  | <i>CENPM</i>            | 1514          | 14                | Transcript Dependent          | No                     | Less                      | Upregulated               | Yes                                     |
| chr7:108095719-108097606 | <i>LAMB4</i>            | 1888          | 11                | Mid Gene intronic             | No                     | Less                      | Downregulated             | No                                      |
| chr16:23680392-23681287  | <i>PLK1</i>             | 896           | 5                 | Mid Gene intronic             | No                     | More                      | Upregulated               | No                                      |
| chr15:40731625-40735036  | <i>RAD51</i>            | 1605          | 15                | In promoter                   | No                     | Less                      | Upregulated               | Yes                                     |
| chr15:64752519-64753130  | <i>RBPM52</i>           | 612           | 6                 | Transcript Dependent          | No                     | Less                      | Upregulated               | Yes                                     |
| chr22:24180492-24181665  | <i>SUSD2</i>            | 1174          | 11                | In promoter                   | No                     | Less                      | Upregulated               | Yes                                     |

## 406 **Discussion**

407           To gain insight into the role of DNA methylation in spontaneous preterm birth, we utilized  
408 pairwise comparisons of methylation between spontaneous preterm births and normal term births  
409 using a general linear model adjusting for fetal sex and gestational age at delivery. It is essential  
410 to note that normal gestationally age-matched placental samples are typically not available for  
411 studies such as this depending on ethical restrictions of the geographical locale of the study.  
412 Therefore, we opted to use with acute histologic chorioamnionitis samples (AHC) which been  
413 previously shown to have much lower occurrences of AVM than other clinically defined preterm  
414 birth types including PE and IUGR(7,8) We were able to identify distinct methylation profiles at  
415 both the positional (DMP) and regional (DMR) levels in isPTB and AHC. Through bioinformatic  
416 functional assessment, we were able to identify pathways of interest pertaining to placental  
417 maturation.

418           Our preliminary analyses indicated that there were very few DMP and DMR between the  
419 isPTB and TB birth types regardless of the statistical parameters applied. We tested multiple  
420 parameters within the statistical models to ensure that lack of differences was likely due to  
421 biological factors, not technical errors. Given the sheer number of datapoints being examined, we  
422 felt that relaxing the Q value to 0.3 would not adversely affect our analyses and we were willing  
423 to accept the potential increase in false positives(39,40). This allowed us to better assess any  
424 potential differences between isPTB and TB despite the potential increase in false positives. The  
425 Benjamini Hochberg correction is dependent on the overall number of samples to be corrected and  
426 considered to be rather conservative. Regardless of the statistical parameters applied, the isPTB  
427 profile mimicked the TB profile to a high degree which, agrees with the transcriptomic profiles we

428 previously identified(16) and provides additional evidence of a potential placental hypermaturity  
429 profile associated with isPTB. Although this a preliminary study investigating DNA methylation  
430 in spontaneous preterm birth, this pattern of DNA methylation was also observed in studies of  
431 iatrogenic preterm births in DMP and DMR analyses, for both PE and IUGR(20). In the second  
432 study, focusing on imprinted regions found that IUGR samples also mimicked the PE and term  
433 controls(41). Pyrosequencing from this second study confirmed no differences in the DMRs  
434 suggesting the detection of hypermaturity molecular profile. Given that hypermaturity is estimated  
435 to affect 50-60% of all preterm births including PE and IUGR(7,8), these results provide additional  
436 evidence supporting the use of placental DNAm clinically to classify pathophysiologies such as  
437 hypermaturity(20,42).

438 DMRs are associated with numerous disease pathologies in multiple tissues(43,44). While  
439 DNAm has been studied in the other adverse pregnancy outcomes such as PE and IUGR, this study  
440 is the first to look specifically at isPTB. Our analysis resulted in the identification of seven DMRs  
441 with isPTB specific methylation patterns; two are associated with non-coding transcripts  
442 (*LINC02028* and *UBL7-AS*), five with genes (*ZBTB4*, *STXBP6*, *PDE9A*, *NOD2*, and *FAM186A*).  
443 Of these genes, four are of particular interest due to their potential function in or previous  
444 association with PTB.

445 *ZBTB4* is a placentally expressed gene coding for a transcription factor that binds  
446 methylated CpGs in a repressive manner, controls TP53 responses in cells, and inhibits cell growth  
447 and proliferation (45–47). TP53 was identified as a potential biological pathway of interest in our  
448 microarray meta-analysis of spontaneous PTB(48) and has been implicated in isPTB from a uterine  
449 perspective in mice(49). *STXBP6*, also known as *AMISYN*, binds SNARE complex proteins  
450 together(50). As SNARE complexes have been well described in synaptic vesicle formation and



451 exocytosis(51) and regulation of membrane fusion dynamics(52,53), the presence of this protein  
452 in the placenta suggests potential role in placental extracellular vesicle formation or the mediation  
453 of membrane fusion during cytotrophoblast differentiation(52,54).

454 *PDE9A* functions in the hydrolysis of cAMP into monophosphates, modulating the  
455 bioavailability of cAMP and cGMP in cells(55). cAMP signaling is essential to cytotrophoblast  
456 differentiation into syncytiotrophoblast(56); therefore, alteration of PDE9A expression or function  
457 impacts cAMP bioavailability potentially altering this specific trophoblast differentiation pathway.  
458 In fact, PDE9A has been proposed as a potential first trimester maternal serum biomarker for  
459 Trisomy 21(57). Placentas from Trisomy 21 fetuses have multiple defects in cytotrophoblast  
460 differentiation, specifically cell fusion, resulting in what appears to be delayed villous maturation,  
461 indicating a key role for this gene in normal placental maturation(57–60).

462 *NOD2* has a role in activation of the innate inflammatory response and has been implicated  
463 in NF $\kappa$ B activation(61–63). NF $\kappa$ B activation is a central component of pro-inflammatory /labor  
464 pathways in both normal term and preterm pathophysiology(62,64,65). As a member of the NOD-  
465 like receptor family, NOD2 has been previously associated with recognition of pathogen  
466 associated molecular patterns (PAMPs) and damage associated molecular patterns (DAMPs) both  
467 of which have been associated with preterm labor and birth(62). The activation of pathways  
468 associated with PAMPs and DAMPs have previously been associated with sPTB and iatrogenic  
469 PTB(48,66–68). NOD2 has been studied primarily in the context of a proinflammatory factor in  
470 fetal membranes and myometrium; however, *NOD2* is expressed in first trimester and term  
471 placental tissues, specifically in syncytiotrophoblast and stromal cells(61,69). Furthermore, NOD2  
472 polymorphisms have been associated with preterm birth in several genetic studies examining

473 innate immunity, preterm premature rupture of membranes (PPROM), and early onset PE and  
474 HELLP (Hemolysis, Elevated Liver enzymes and Low Platelets) syndromes(62,67,70,71).

475       Taken together, these isPTB DMRs and their associated genes suggest that altered DNA  
476 methylation maybe highly influential in isPTB; however, from these data alone, it cannot be  
477 determined if this is causative or the result of isPTB as the samples were obtained at delivery.  
478 Although we cannot sample placental tissues throughout gestation to determine cause or effect,  
479 using DNAm profiling on delivered placental tissues will provide key insights in the  
480 pathophysiological underpinnings of adverse pregnancy outcomes.

481       In contrast to the isPTB DNAm profile, our examination of the AHC samples compared to  
482 the isPTB and TB samples identified 1,718 DMRs. We observed within the top 25 more/less  
483 methylated DMRs, multiple DMRs were associated with genes of interest that were previously  
484 associated with adverse pregnancy outcomes including IUGR and PE. Several have also been  
485 associated gestational diabetes mellitus (GDM) which can also result in preterm birth. These genes  
486 of interest include: *MLLT1*(72), *FGFR2*(72), *CACNA1A*(73), *GCK*(74,75), *FER1L6*(76),  
487 *CTSH*(77), and *ACAP3*(78). Additionally, *GSE1* (79), *VSTM1*(80), and *ACSSI*(79) are expressed  
488 in the placenta but have not yet been associated with an adverse pregnancy outcome. Our pathway  
489 analyses of the more methylated DMRs, yielded two pathways with statistical over-representation,  
490 WNT and Cadherin signaling. Both pathways are necessary for placental development and  
491 maturation(81–84) and a prior methylation study in PE also identified differential methylation  
492 (increased methylation) in WNT and cadherin signaling(85), which agrees with our findings.  
493 Given that over 50% of PE cases have hypermaturity along with the pathological hallmarks of PE,  
494 this may indicate a role for these pathways in placental maturation.

495 We initially hypothesized that changes in methylation at CpG islands could be driving the  
496 transcriptional differences we previously observed. However, when we intersected our significant  
497 DMRs with our candidate genes, we did not observe any overlap in the isPTB profiles and only  
498 eight examples of overlap in the AHC profiles. Of those eight DMR/gene combinations, only  
499 *CDKN2A/CDKN2B-AS* overlapped with a CpG island. *CDKN2A*, also known as p16, is a gene  
500 with multiple transcripts which have different first exons. Known as an important tumor  
501 suppressor, its primary role is regulating cell cycle progression through the regulation of TP53.  
502 Loss of function studies of *Cdkn2a* and *Tp53* in mice have demonstrated histopathological changes  
503 in placenta and upregulated senescence markers as well as mitotic inhibition(86). *CDKN2B-AS* is  
504 a functional RNA with regulatory roles via interaction with *PRCI* and *PRCI* which regulates the  
505 rest of the genes in this locus epigenetically(87). Additionally, *CDKN2B-AS*, also known as  
506 *ARNIL*, has been implicated in preterm birth  
507 Interestingly, This DMR resides in locus consisting of *CDKN2A/CDKN2A-DT/CDKN2B-*  
508 *AS/CDKN2B*, a locus vital to cell cycle control and is dysregulated in many cancers. *CDKNA-DT*  
509 is a divergent transcript with no known function. However, *CDKN2B*, also known as *p15*, is  
510 another critical tumor suppressor which inhibits cyclin kinases CDK4 and CDK6(87). These data  
511 along with our methylation data suggest the correct expression of the *CDKN2A/CDKN2A-*  
512 *DT/CDKN2B-AS/CDKN2B* locus is critical to the structure, function, and potentially the rate of  
513 maturity of the placenta and normal healthy pregnancy.

514 *CENPM* and *SUSD2* all have roles in cell cycling and proliferation with mutations  
515 associated with cancers. In many cancers the loss of methylation is associated with cell  
516 proliferation and migration via metastasis. However, in the developing and maturing placenta these  
517 processes are essential for growth, function, and maturation(42,88,89). Less methylation at the

518 DMRs associated with *RAD51*, *RBPMS2*, *ATNI* and the corresponding upregulation could be  
519 indicative of senescence given their respective roles in DNA repair, regulation of cell  
520 differentiation, and transcriptional repression. While the intersection of our matched  
521 transcriptional and methylation data did not necessarily support our original hypothesis of gene  
522 regulation via CpG islands in promoter regions, we were able to identify a potentially critical  
523 biological function, cell proliferation and an essential locus, *CDKN2A/CDKN2A-DT/CDKN2B-*  
524 *AS/CDKN2B*, for further study.

525         One of the caveats to studying placental villous omics of any nature is the lack of normal  
526 gestational age matched tissue due to limited accessibility throughout gestation. We previously  
527 utilized infection associated samples in our transcriptome analyses as our gestational age controls  
528 as their villi did not appear to be inflamed via pathological assessment. While we cannot rule out  
529 that changes at AHC loci may be due to infection, we did not observe pathways or GO terms  
530 associated with immunity or infection. Our data suggests that the overall AHC DNAm profile is  
531 reflective of appropriate villous maturation rather than an infection profile as was observed in our  
532 transcriptome data(16).

533         This is the first study to examine DNAm in spontaneous preterm birth in the context of  
534 placental maturity. The identification of hypermaturity profiles by both positional and regional  
535 differences in methylation highlights importance of DNAm to placental maturation and thus  
536 warrants further study. These differences could be due to altered trophoblast biology. These data  
537 when taken in the context of a potential epigenetic clock, suggests that perhaps epigenetic aging  
538 may have a role as it has in other fetal tissue and stem cells(90,91). Future studies need to  
539 investigate the origin of the observed hypermaturity and its impact on the maternal-fetal interface  
540 and pregnancy outcomes.

541

## 542 **Acknowledgements**

543 The authors would like to express their gratitude to the patients who donated their placentas for  
544 research. We would also like to thank Pietro Presicce, Paranthaman Senthamarai Kannan, and  
545 Manuel Alvarez (Kallapur lab), William E. Ackerman, Irina A. Buhimschi (Buhimschi lab),  
546 GAPPS, and RCWIH for assisting us in obtaining the placental samples and covariate data.  
547 Additionally, the authors thank the staff at the University of Cincinnati Genomics, Epigenomics  
548 and Sequencing Core and the University of Minnesota Genomics Center for their assistance in  
549 generating the methylation data for this project. Data for this study has been deposited into the  
550 Gene Expression Omnibus (GEO) under GSE197795 and will be released pending full  
551 publication of this manuscript.

552

## References:

1. Blencowe H, Cousens S, Chou D, Oestergaard M, Say L, Moller A-B, et al. Born Too Soon: The global epidemiology of 15 million preterm births. *Reproductive Health*. 2013;10(Suppl 1):S2.
2. Chawanpaiboon S, Vogel JP, Moller A-B, Lumbiganon P, Petzold M, Hogan D, et al. Global, regional, and national estimates of levels of preterm birth in 2014: a systematic review and modelling analysis. *The Lancet Global Health*. 2018;7(Acta Obstet Gynecol Scand 56 1977):e37–46.
3. Monangi NK, Brockway HM, House M, Zhang G, Muglia LJ. The genetics of preterm birth: Progress and promise. *Seminars in perinatology*. 2015;39(8):574–83.
4. Burton GJ, Fowden AL. The placenta: a multifaceted, transient organ. *Philosophical Transactions of the Royal Society of London B: Biological Sciences*. 2015;370(1663):20140066.
5. Khong TY, Mooney EE, Ariel I, Balmus NCM, Boyd TK, Brundler M-A, et al. Sampling and Definitions of Placental Lesions: Amsterdam Placental Workshop Group Consensus Statement. *Archives of Pathology & Laboratory Medicine*. 2016;140(7):698–713.
6. Sankar DK, Bhanu SP, Kiran S, Ramakrishna B, Shanthi V. Vasculosyncytial membrane in relation to syncytial knots complicates the placenta in preeclampsia: a histomorphometrical study. *Anatomy & Cell Biology*. 2012;45(2):86–91.
7. Morgan TK. Role of the Placenta in Preterm Birth: A Review. *American Journal of Perinatology*. 2016;33(03):258–66.
8. Nijman TA, Vliet EO van, Benders MJ, Mol BW, Franx A, Nikkels PG, et al. Placental histology in spontaneous and indicated preterm birth: A case control study. *Placenta*. 2016;48:56–62.
9. Manuck TA, Esplin SM, Biggio J, Bukowski R, Parry S, Zhang H, et al. The phenotype of spontaneous preterm birth: application of a clinical phenotyping tool. *American Journal of Obstetrics and Gynecology*. 2015;212(4):487.e1-487.e11.

10. Benton SJ, Leavey K, Gynspan D, Cox BJ, Bainbridge SA. The clinical heterogeneity of preeclampsia is related to both placental gene expression and placental histopathology. *American journal of obstetrics and gynecology*. 2018;219(6):604.e1-604.e25.
11. Moutquin J-M. Classification and heterogeneity of preterm birth. *BJOG: An International Journal of Obstetrics and Gynaecology*. 2003;110(s20):30–3.
12. Yuen RKC, Robinson WP. Review: A high capacity of the human placenta for genetic and epigenetic variation: Implications for assessing pregnancy outcome. *Placenta*. 2011;32:S136–41.
13. Whigham C-AA, MacDonald TM, Walker SP, Hannan NJ, Tong S, Kaitu'u-Lino TJ. The untapped potential of placenta-enriched molecules for diagnostic and therapeutic development. *Placenta*. 2019;
14. Ghaemi MS, Tarca AL, Romero R, Stanley N, Fallahzadeh R, Tanada A, et al. Proteomic signatures predict preeclampsia in individual cohorts but not across cohorts – implications for clinical biomarker studies. *J Maternal-fetal Neonatal Medicine*. 2021;1–8.
15. Steyerberg EW. Clinical Prediction Models, A Practical Approach to Development, Validation, and Updating. *Statistics Biology Heal*. 2008;83–100.
16. Brockway HM, Kallapur SG, Buhimschi IA, Buhimschi CS, Ackerman WE, Muglia LJ, et al. Unique transcriptomic landscapes identified in idiopathic spontaneous and infection related preterm births compared to normal term births. *PloS one*. 2019;14(11):e0225062.
17. Yuen RK, Peñaherrera MS, Dadelszen P von, McFadden DE, Robinson WP. DNA methylation profiling of human placentas reveals promoter hypomethylation of multiple genes in early-onset preeclampsia. *European journal of human genetics : EJHG*. 2010;18(9):1006–12.
18. Parets SE, Conneely KN, Kilaru V, Menon R, Smith AK. DNA methylation provides insight into intergenerational risk for preterm birth in African Americans. *Epigenetics*. 2015;10(9):784–92.
19. Avila L, Yuen RK, Diego-Alvarez D, Peñaherrera MS, Jiang R, Robinson WP. Evaluating DNA methylation and gene expression variability in the human term placenta. *Placenta*. 2010;31(12):1070–7.
20. Wilson SL, Leavey K, Cox BJ, Robinson WP. Mining DNA methylation alterations towards a classification of placental pathologies. *Human molecular genetics*. 2018;27(1):135–46.
21. Gardiner-Garden M, Frommer M. CpG Islands in vertebrate genomes. *J Mol Biol*. 1987;196(2):261–82.
22. Maksimovic J, Phipson B, Oshlack A. A cross-package Bioconductor workflow for analysing methylation array data. *F1000Research*. 2016;5:1281.
23. Huber W, Carey VJ, Gentleman R, Anders S, Carlson M, Carvalho BS, et al. Orchestrating high-throughput genomic analysis with Bioconductor. *Nat Methods*. 2015;12(2):115–21.

24. Team Rs. RStudio: Integrated Development for R. RStudio. 2020; Available from: <http://www.rstudio.com/>.
25. Team RC. R: A language and environment for statistical `##` computing. R Foundation for Statistical Computing [Internet]. 2020; Available from: <https://www.R-project.org/>
26. Aryee MJ, Jaffe AE, Corrada-Bravo H, Ladd-Acosta C, Feinberg AP, Hansen KD, et al. Minfi: a flexible and comprehensive Bioconductor package for the analysis of Infinium DNA methylation microarrays. *Bioinformatics*. 2014;30(10):1363–9.
27. S D, P D, S B, Triche, T Jr, M B. methylumi: Handle Illumina methylation data. 2020; Available from: <https://www.bioconductor.org/packages/release/bioc/html/methylumi.html>
28. Fortin J-P, Labbe A, Lemire M, Zanke BW, Hudson TJ, Fertig EJ, et al. Functional normalization of 450k methylation array data improves replication in large cancer studies. *Genome Biology*. 2014;15(11):503.
29. Zhou W, Laird PW, Shen H. Comprehensive characterization, annotation and innovative use of Infinium DNA methylation BeadChip probes. *Nucleic Acids Research*. 2017;45(4):e22–e22.
30. McCartney DL, Walker RM, Morris SW, McIntosh AM, Porteous DJ, Evans KL. Identification of polymorphic and off-target probe binding sites on the Illumina Infinium MethylationEPIC BeadChip. *Genomics Data*. 2016;9:22–4.
31. Amemiya HM, Kundaje A, Boyle AP. The ENCODE Blacklist: Identification of Problematic Regions of the Genome. *Scientific Reports*. 2019;9(1):9354.
32. Price EM, Robinson WP. Adjusting for Batch Effects in DNA Methylation Microarray Data, a Lesson Learned. *Frontiers in genetics*. 2018;9:83.
33. Du P, Zhang X, Huang C-C, Jafari N, Kibbe WA, Hou L, et al. Comparison of Beta-value and M-value methods for quantifying methylation levels by microarray analysis. *BMC Bioinformatics*. 2010;11(1):587.
34. Ritchie ME, Phipson B, Wu D, Hu Y, Law CW, Shi W, et al. limma powers differential expression analyses for RNA-sequencing and microarray studies. *Nucleic Acids Research*. 2015;43(7):e47–e47.
35. Benjamini Y, Hochberg Y. Controlling the False Discovery Rate: A Practical and Powerful Approach to Multiple Testing. *Journal of the Royal Statistical Society: Series B (Methodological)*. 1995;57(1):289–300.
36. Oliveros, J.C. Venny. An interactive tool for comparing lists with Venn’s diagrams. 2015; Available from: <https://bioinfogp.cnb.csic.es/tools/venny/index.html>
37. Peters TJ, Buckley MJ, Statham AL, Pidsley R, Samaras K, Lord RV, et al. De novo identification of differentially methylated regions in the human genome. *Epigenetics & Chromatin*. 2015;8(1):6.



38. Mi H, Huang X, Muruganujan A, Tang H, Mills C, Kang D, et al. PANTHER version 11: expanded annotation data from Gene Ontology and Reactome pathways, and data analysis tool enhancements. *Nucleic Acids Research*. 2017;45(D1):D183–9.
39. Li D, Xie Z, Pape M, Dye T. An evaluation of statistical methods for DNA methylation microarray data analysis. *BMC Bioinformatics*. 2015;16(1):217.
40. Mansell G, Gorrie-Stone TJ, Bao Y, Kumari M, Schalkwyk LS, Mill J, et al. Guidance for DNA methylation studies: statistical insights from the Illumina EPIC array. *Bmc Genomics*. 2019;20(1):366.
41. Monteagudo-Sánchez A, Sánchez-Delgado M, Mora JRH, Santamaría NT, Gratacós E, Esteller M, et al. Differences in expression rather than methylation at placenta-specific imprinted loci is associated with intrauterine growth restriction. *Clin Epigenetics*. 2019;11(1):35.
42. Wilson SL, Robinson WP. Utility of DNA methylation to assess placental health. *Placenta*. 2018;64 Suppl 1:S23–8.
43. Wilson AS, Power BE, Molloy PL. DNA hypomethylation and human diseases. *Biochimica Et Biophysica Acta Bba - Rev Cancer*. 2007;1775(1):138–62.
44. Ehrlich M. DNA hypermethylation in disease: mechanisms and clinical relevance. *Epigenetics*. 2019;14(12):1–23.
45. Filion GJP, Zhenilo S, Salozhin S, Yamada D, Prokhortchouk E, Defossez P-A. A Family of Human Zinc Finger Proteins That Bind Methylated DNA and Repress Transcription. *Mol Cell Biol*. 2006;26(1):169–81.
46. Yu Y, Shang R, Chen Y, Li J, Liang Z, Hu J, et al. Tumor suppressive ZBTB4 inhibits cell growth by regulating cell cycle progression and apoptosis in Ewing sarcoma. *Biomed Pharmacother*. 2018;100:108–15.
47. Weber A, Marquardt J, Elzi D, Forster N, Starke S, Glaum A, et al. Zbtb4 represses transcription of P21CIP1 and controls the cellular response to p53 activation. *Embo J*. 2008;27(11):1563–74.
48. Paquette AG, Brockway HM, Price ND, Muglia LJ. Comparative transcriptomic analysis of human placentae at term and preterm delivery. *Biology of reproduction*. 2018;98(1):89–101.
49. Hirota Y, Daikoku T, Tranguch S, Xie H, Bradshaw HB, Dey SK. Uterine-specific p53 deficiency confers premature uterine senescence and promotes preterm birth in mice. *Journal of Clinical Investigation*. 2010;120(3):803–15.
50. Scales SJ, Hesser BA, Masuda ES, Scheller RH. Amisyn, a Novel Syntaxin-binding Protein That May Regulate SNARE Complex Assembly\*. *J Biol Chem*. 2002;277(31):28271–9.
51. Wang T, Li L, Hong W. SNARE proteins in membrane trafficking. *Traffic*. 2017;18(12):767–75.

52. Han J, Pluhackova K, Böckmann RA. The Multifaceted Role of SNARE Proteins in Membrane Fusion. *Front Physiol.* 2017;8:5.
53. Bogaart G van den, Jahn R. Counting the SNAREs needed for membrane fusion. *J Mol Cell Biol.* 2011;3(4):204–5.
54. Guček A, Gandasi NR, Omar-Hmeadi M, Bakke M, Døskeland SO, Tengholm A, et al. Fusion pore regulation by cAMP/Epac2 controls cargo release during insulin exocytosis. *Elife.* 2019;8:e41711.
55. Rentero C, Puigdomènech P. Specific use of start codons and cellular localization of splice variants of human phosphodiesterase 9A gene. *Bmc Mol Biol.* 2006;7(1):39.
56. Gerbaud P, Taskén K, Pidoux G. Spatiotemporal regulation of cAMP signaling controls the human trophoblast fusion. *Front Pharmacol.* 2015;6:202.
57. Lim JH, Kim SY, Park SY, Lee SY, Kim MJ, Han YJ, et al. Non-Invasive Epigenetic Detection of Fetal Trisomy 21 in First Trimester Maternal Plasma. *Plos One.* 2011;6(11):e27709.
58. Frendo JL, Vidaud M, Guibourdenche J, Luton D, Muller F, Bellet D, et al. Defect of villous cytotrophoblast differentiation into syncytiotrophoblast in Down's syndrome. *The Journal of clinical endocrinology and metabolism.* 2000;85(10):3700–7.
59. Pidoux G, Gerbaud P, Cocquebert M, Segond N, Badet J, Fournier T, et al. Review: Human trophoblast fusion and differentiation: Lessons from trisomy 21 placenta. *Placenta.* 2011;33:S81–6.
60. Malassiné A, Frendo J-L, Evain-Brion D. Trisomy 21- affected placentas highlight prerequisite factors for human trophoblast fusion and differentiation. *International Journal of Developmental Biology.* 2009;54(2–3):475–82.
61. Bryant AH, Bevan RJ, Spencer-Harty S, Scott LM, Jones RH, Thornton CA. Expression and function of NOD-like receptors by human term gestation-associated tissues. *Placenta.* 2017;58:25–32.
62. Lappas M. NOD1 and NOD2 Regulate Proinflammatory and Prolabor Mediators in Human Fetal Membranes and Myometrium via Nuclear Factor-Kappa B. *Biol Reprod.* 2013;89(1):Article 14, 1-11.
63. Bourhis LL, Benko S, Girardin SE. Nod1 and Nod2 in innate immunity and human inflammatory disorders. *Biochem Soc T.* 2007;35(6):1479–84.
64. Marchand M, Horcajadas JA, Esteban FJ, McElroy SL, Fisher SJ, Giudice LC. Transcriptomic Signature of Trophoblast Differentiation in a Human Embryonic Stem Cell Model. *Biology of Reproduction.* 2011;84(6):1258–71.
65. Wang B, Palomares K, Parobchak N, Cece J, Rosen M, Nguyen A, et al. Glucocorticoid Receptor Signaling Contributes to Constitutive Activation of the Noncanonical NF- $\kappa$ B Pathway in Term Human Placenta. *Molecular Endocrinology.* 2013;27(2):203–11.

66. Tang D, Kang R, Coyne CB, Zeh HJ, Lotze MT. PAMPs and DAMPs: signal 0s that spur autophagy and immunity. *Immunological Reviews*. 2012;249(1):158–75.
67. Rijn BB van, Franx A, Steegers EAP, Groot CJM de, Bertina RM, Pasterkamp G, et al. Maternal TLR4 and NOD2 Gene Variants, Pro-Inflammatory Phenotype and Susceptibility to Early-Onset Preeclampsia and HELLP Syndrome. *Plos One*. 2008;3(4):e1865.
68. Robertson SA, Hutchinson MR, Rice KC, Chin P, Moldenhauer LM, Stark MJ, et al. Targeting Toll-like receptor-4 to tackle preterm birth and fetal inflammatory injury. *Clin Transl Immunol*. 2020;9(4):e1121.
69. Costello MJ, Joyce SK, Abrahams VM. NOD Protein Expression and Function in First Trimester Trophoblast Cells. *Am J Reprod Immunol*. 2007;57(1):67–80.
70. Strauss JF, Romero R, Gomez-Lopez N, Haymond-Thornburg H, Modi BP, Teves ME, et al. Spontaneous preterm birth: advances toward the discovery of genetic predisposition. *Am J Obstet Gynecol*. 2018;218(3):294-314.e2.
71. Härtel Ch, Finas D, Ahrens P, Kattner E, Schaible Th, Müller D, et al. Polymorphisms of genes involved in innate immunity: association with preterm delivery. *Mhr Basic Sci Reproductive Medicine*. 2004;10(12):911–5.
72. Tekola-Ayele F, Zeng X, Ouidir M, Workalemahu T, Zhang C, Delahaye F, et al. DNA methylation loci in placenta associated with birthweight and expression of genes relevant for early development and adult diseases. *Clin Epigenetics*. 2020;12(1):78.
73. Vennou KE, Kontou PI, Braliou GG, Bagos PG. Meta-analysis of gene expression profiles in preeclampsia. *Pregnancy Hypertens*. 2020;19:52–60.
74. Ramasammy R, Munisammy L, Sweta K, Selvakumar S, Velu K, Rani J, et al. Association between GCK gene polymorphism and gestational diabetes mellitus and its pregnancy outcomes. *Meta Gene*. 2021;28:100856.
75. Beaumont RN, Warrington NM, Cavadino A, Tyrrell J, Nodzinski M, Horikoshi M, et al. Genome wide associatin study of offspring birth weight in 86577 women identifies five novel loci and highlights maternal genetic effects that are independent of fetal genetics. *Human Molecular Genetics*. 2018;27(4):742–56.
76. Lang CT, Markham KB, Behrendt NJ, Suarez AA, Samuels P, Vandred DD, et al. Placental Dysferlin Expression is Reduced in Severe Preeclampsia. *Placenta*. 2009;30(8):711–8.
77. Varanou A, Withington SL, Lakasing L, Williamson C, Burton GJ, Hemberger M. The importance of cysteine cathepsin proteases for placental development. *J Mol Med*. 2006;84(4):305–17.
78. Jia R-Z, Zhang X, Hu P, Liu X-M, Hua X-D, Wang X, et al. Screening for differential methylation status in human placenta in preeclampsia using a CpG island plus promoter microarray. *Int J Mol Med*. 2012;30(1):133–41.

79. Uhlén M, Fagerberg L, Hallström BM, Lindskog C, Oksvold P, Mardinoglu A, et al. Tissue-based map of the human proteome. *Science*. 2015;347(6220):1260419.
80. Guo X, Zhang Y, Wang P, Li T, Fu W, Mo X, et al. VSTM1-v2, a novel soluble glycoprotein, promotes the differentiation and activation of Th17 cells. *Cell Immunol*. 2012;278(1–2):136–42.
81. Sonderegger S, Pollheimer J, Knöfler M. Wnt Signalling in Implantation, Decidualisation and Placental Differentiation – Review. *Placenta*. 2010;31(10):839–47.
82. Knöfler M, Pollheimer J. Human placental trophoblast invasion and differentiation: a particular focus on Wnt signaling. *Frontiers in Genetics*. 2013;4:190.
83. Kokkinos MI, Murthi P, Wafai R, Thompson EW, Newgreen DF. Cadherins in the human placenta – epithelial–mesenchymal transition (EMT) and placental development. *Placenta*. 2010;31(9):747–55.
84. Adu-Gyamfi EA, Czika A, Gorleku PN, Ullah A, Panhwar Z, Ruan L-L, et al. The Involvement of Cell Adhesion Molecules, Tight Junctions, and Gap Junctions in Human Placentation. *Reprod Sci*. 2021;28(2):305–20.
85. Yeung KR, Chiu CL, Pidsley R, Makris A, Hennessy A, Lind JM. DNA methylation profiles in preeclampsia and healthy control placentas. *Am J Physiol-heart C*. 2016;310(10):H1295–303.
86. Gal H, Lysenko M, Stroganov S, Vadai E, Youssef SA, Tzadikévitch-Geffen K, et al. Molecular pathways of senescence regulate placental structure and function. *Embo J*. 2019;38(18):e100849.
87. He S, Gu W, Li Y, Zhu H. ANRIL/CDKN2B-AS shows two-stage clade-specific evolution and becomes conserved after transposon insertions in simians. *Bmc Evol Biol*. 2013;13(1):247.
88. Gamage T, Schierding W, Hurley D, Tsai P, Ludgate JL, Bhoonthpur C, et al. The role of DNA methylation in human trophoblast differentiation. *Epigenetics*. 2018;13(12):1154–73.
89. Mayne BT, Leemaqz SY, Smith AK, Breen J, Roberts CT, Bianco-Miotto T. Accelerated placental aging in early onset preeclampsia pregnancies identified by DNA methylation. *Epigenomics-uk*. 2016;9(3):279–89.
90. Raj K, Horvath S. Current perspectives on the cellular and molecular features of epigenetic ageing. *Exp Biol Med*. 2020;245(17):1532–42.
91. Lee Y, Choufani S, Weksberg R, Wilson SL, Yuan V, Burt A, et al. Placental epigenetic clocks: estimating gestational age using placental DNA methylation levels. *Aging*. 2019;11(12):4238–53.

## Supporting Information

**Supporting Tables:** S1-S5 Tables

**S1 Fig: Genomic Distribution of DMPs within the AHC methylation profile.** The distribution of 6,177 DMPs in the AHC profile. Most probes are found within CpG islands or closely associated with islands.

**S2 Fig: Intersection of significant DMRs** The venn diagram representing the intersection of pairwise comparisons to classify significant DMRs into isPTB and AHC specific profiles

Figure 1

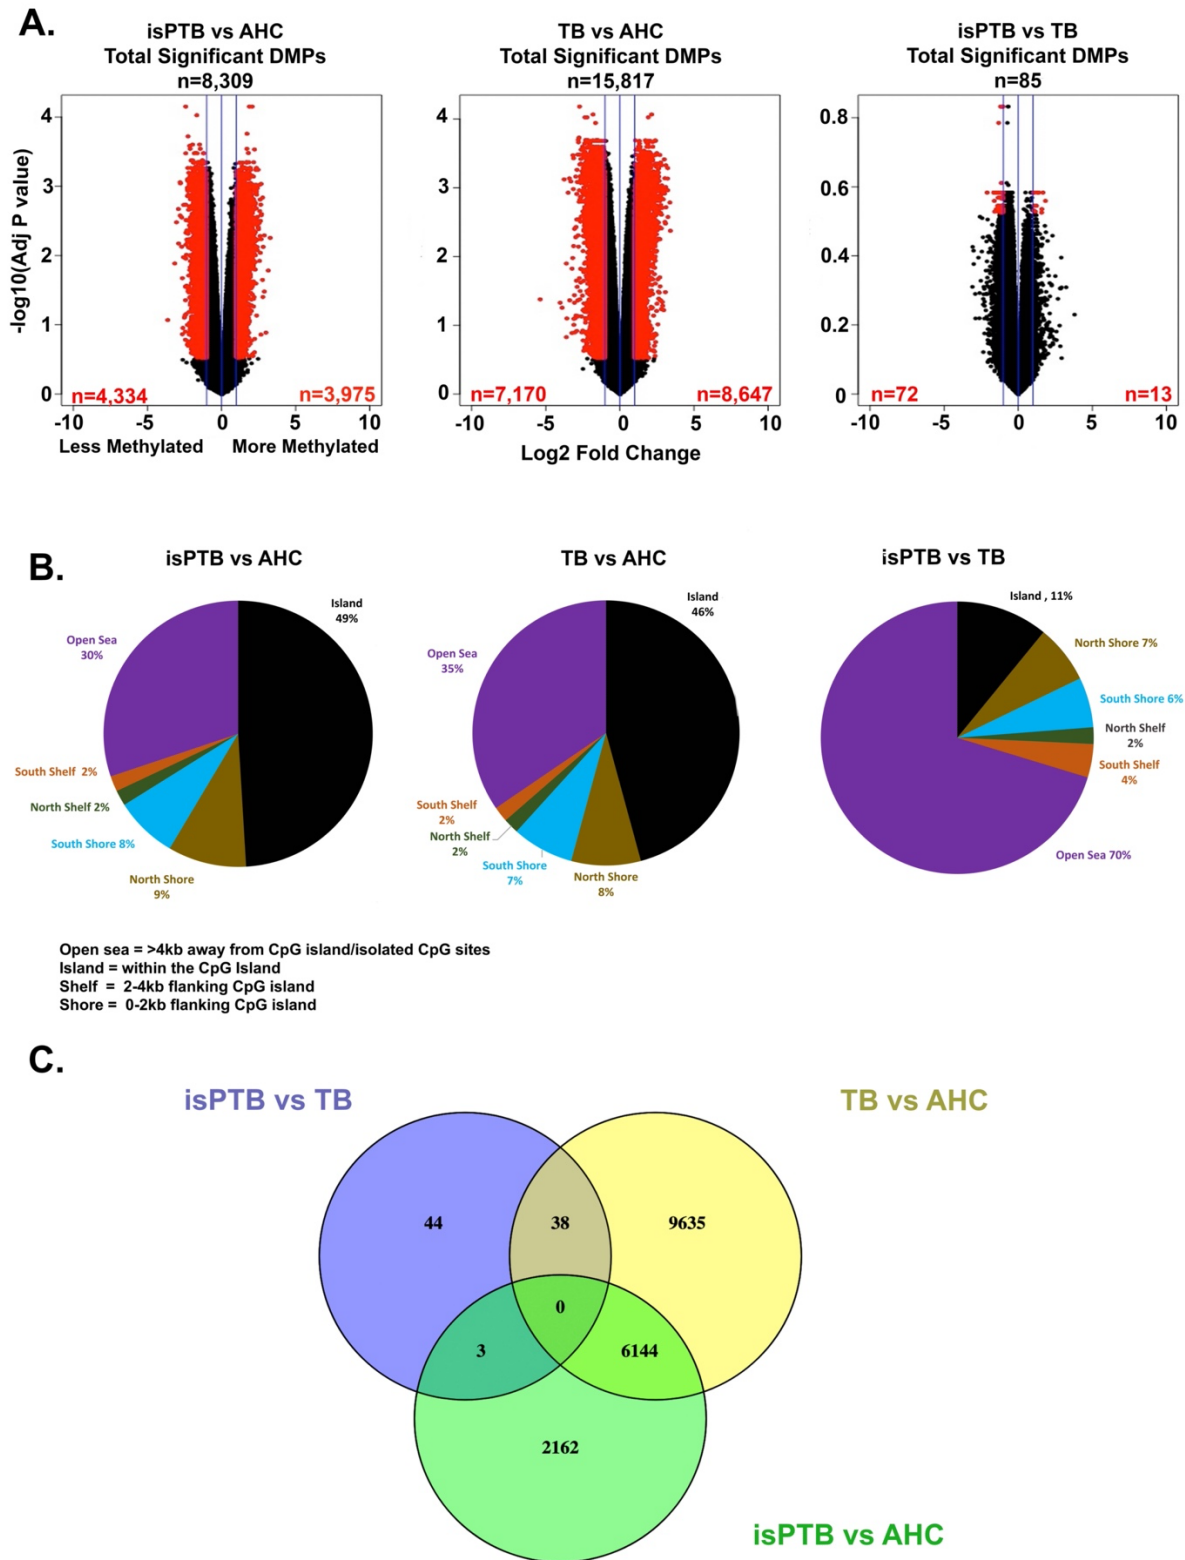

Figure 2

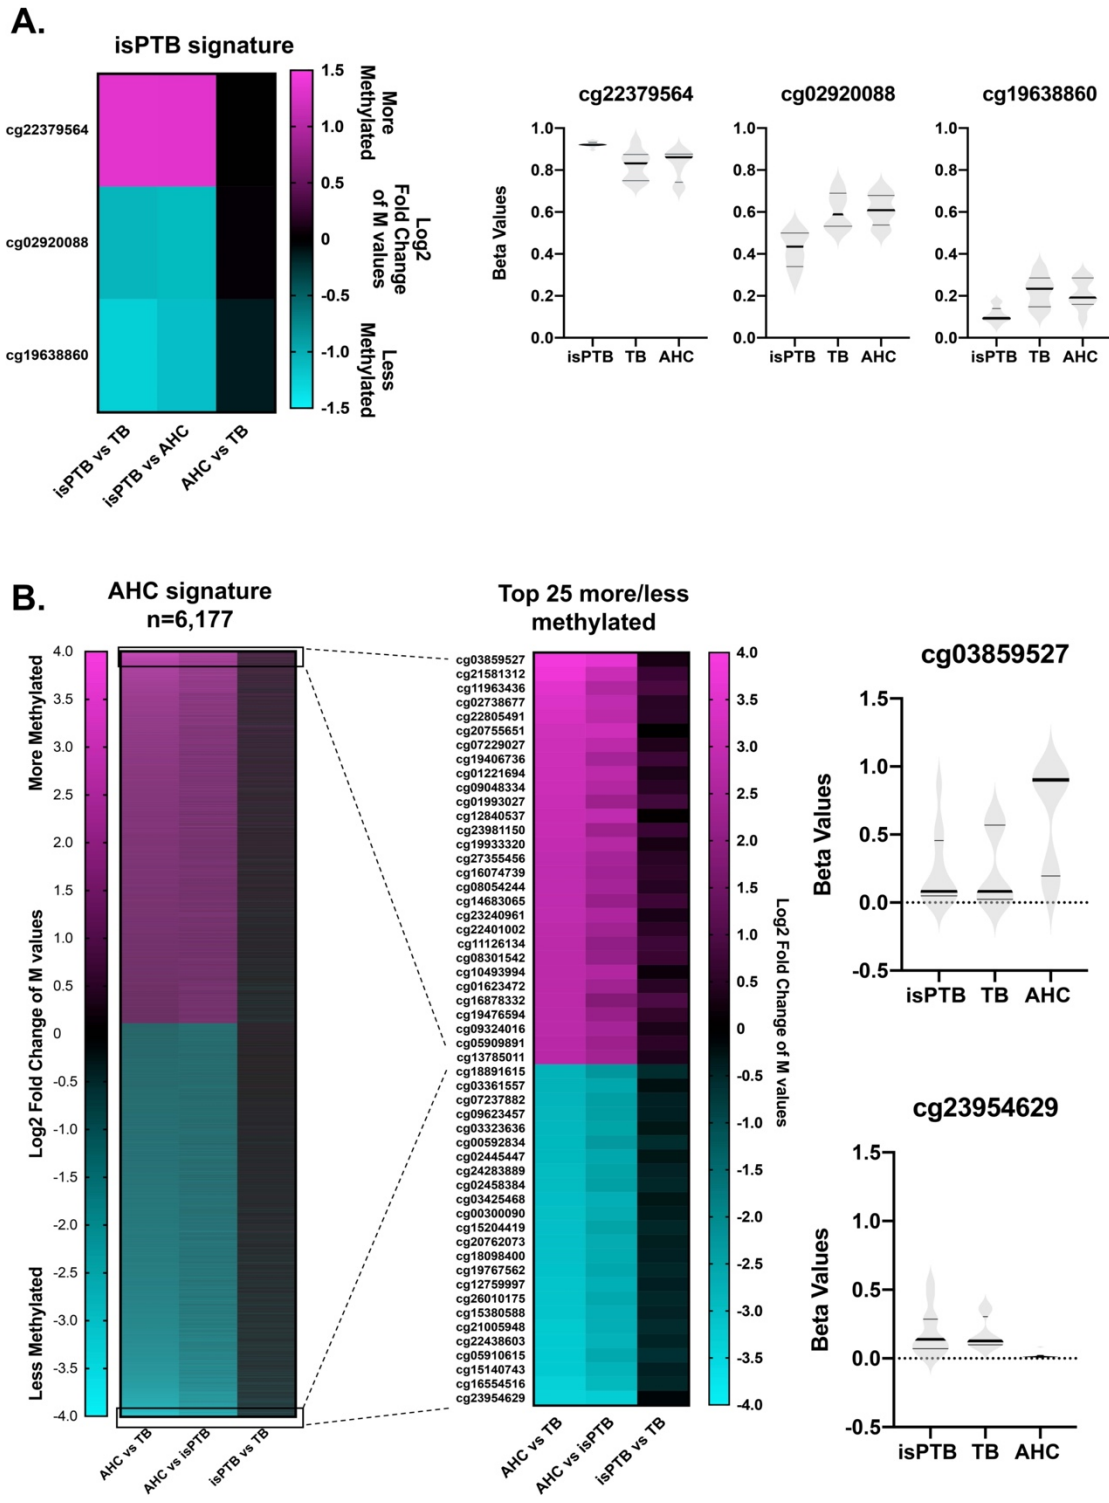

Figure 3



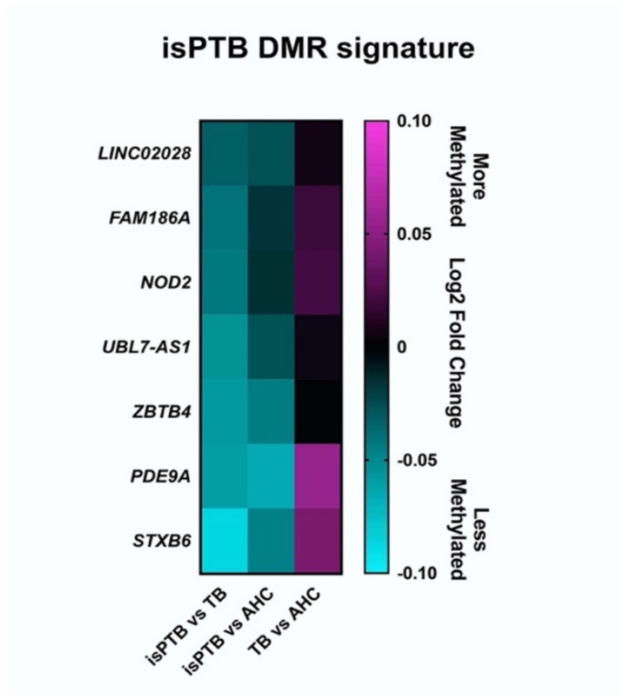

Figure 4

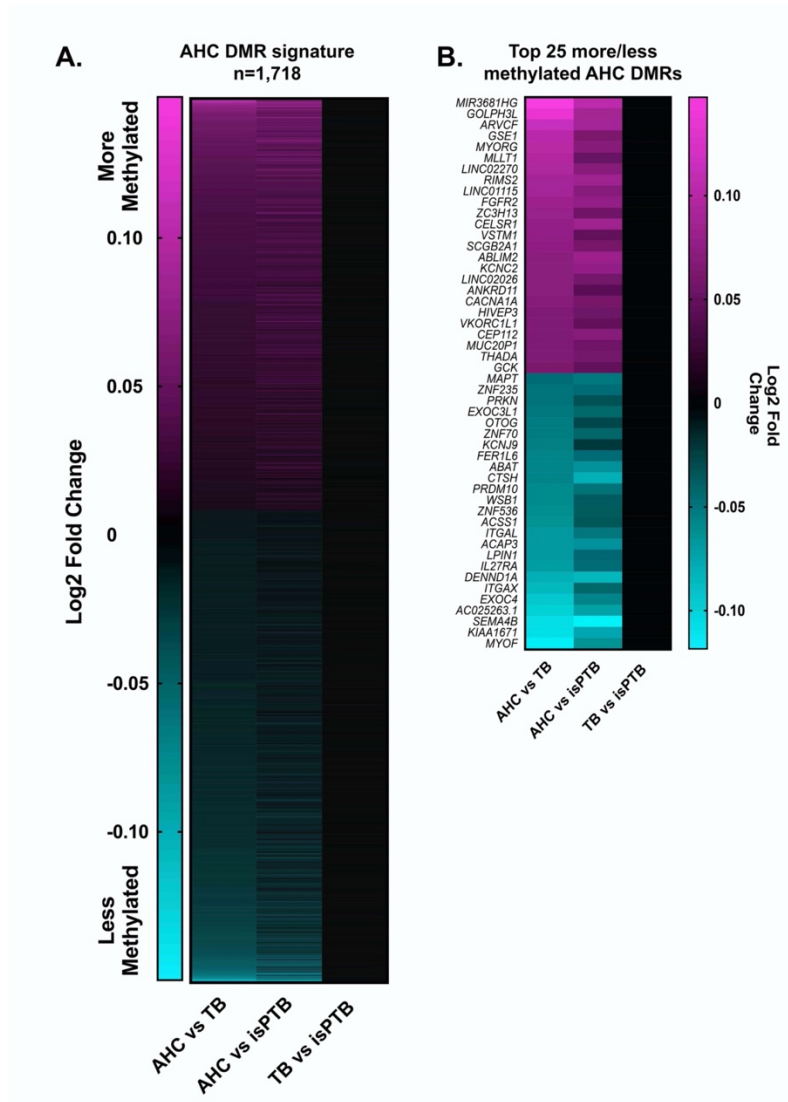

SFig1

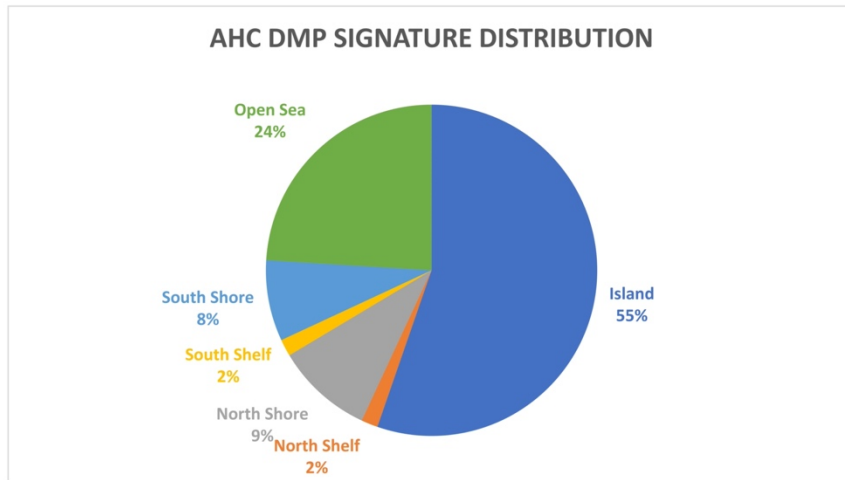

SFig2

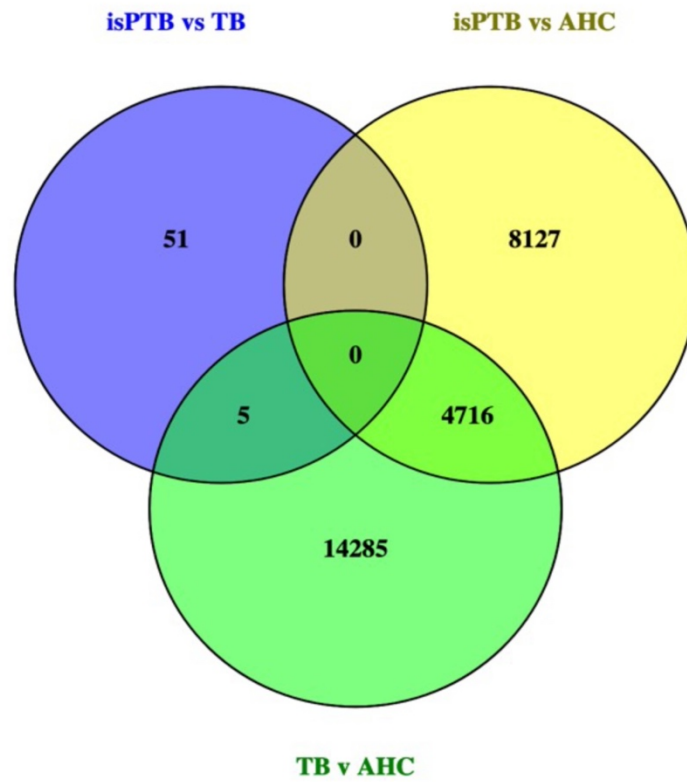

Source: https://www.biorxiv.org/content/10.1101/2021.04.26.441471v3.full.pdf
